# Supplementary material for: 4D printed hydrogel scaffolds with shape morphing by near-infrared to promote bone regeneration through immune and vascular coupling
Source: Research Square preprint supplement (doi:10.21203/rs.3.rs-8124694/v1), 2025-12-01
Supplement: Supplementary file 1 [file e7e10c282ddc56e0f88259ca.docx]

# Supporting Information

**Title: 4D printed hydrogel scaffolds with shape morphing by near-infrared to promote bone regeneration through immune and vascular coupling**

*Authors: Chuqiao Weiab#, Jingjie Zhaiab#, Yidi Zhangab，Yuemeng Zhuab, Yuzhu Hanab, Yangyang Liab, Sicong Renab, Quan Linc*, Hanchi Wangab*, Yanmin Zhouab**


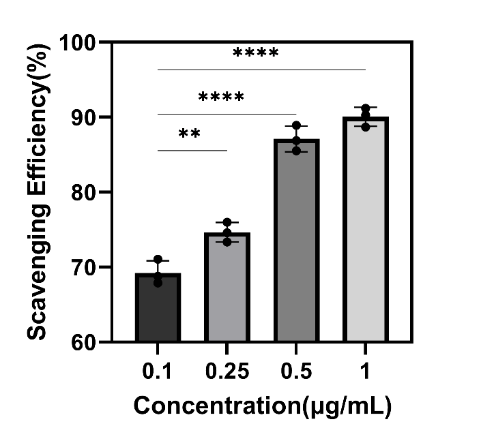


Figure S1 PDA NPs exhibited dose-dependent antioxidant capacity with >90% ABTS scavenging at concentrations >1 mg/mL.


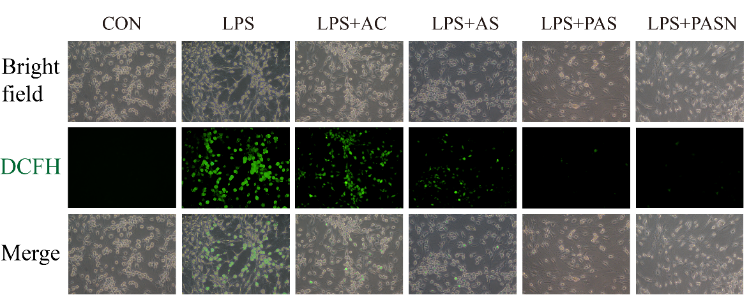


Figure S2. DCFH-DA staining analyses after co-culture with different scaffolds for 1 day


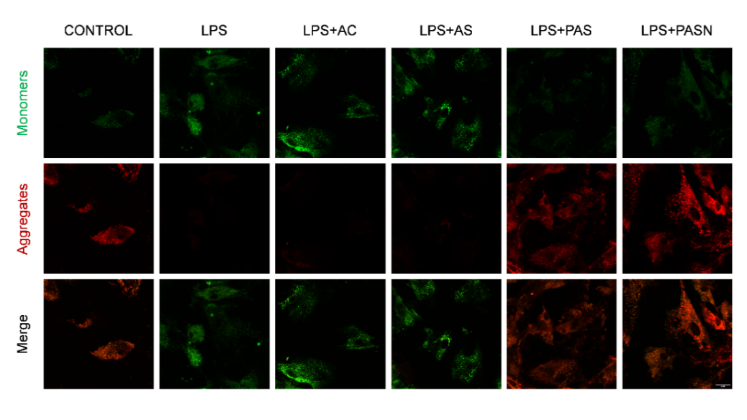


Figure S3 Fluorescence microscope images of JC-1 assay demonstrating activated (labeled red) and abnormal (labeled green) mitochondrial membrane potential.


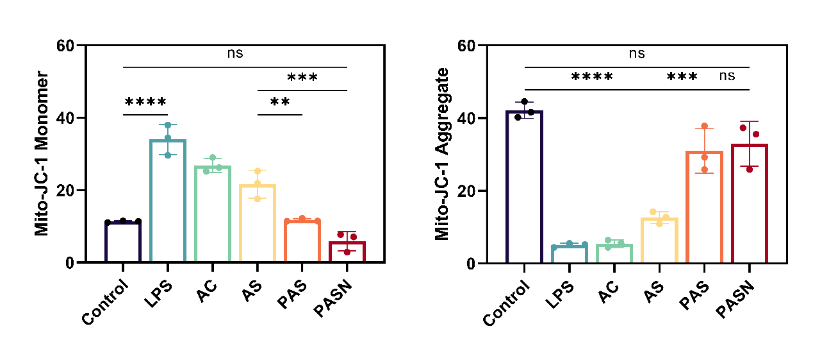
 Figure S4 Fluorescence intensities in BMSCs subjected to JC-1 staining. n = 3 per group.


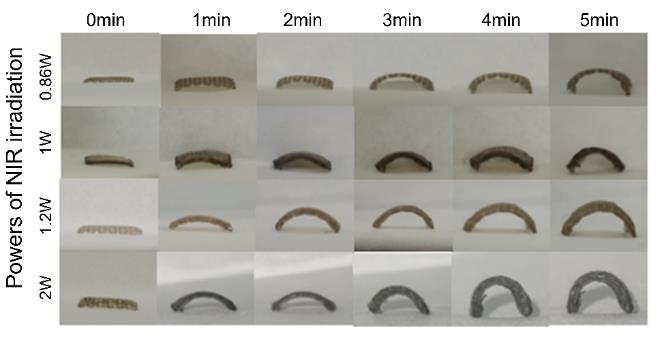


Figure S5 The photographs of the shape changes of 3D printed PDA/Alg/Sr2+ scaffolds under laser irradiation with different power in different time.
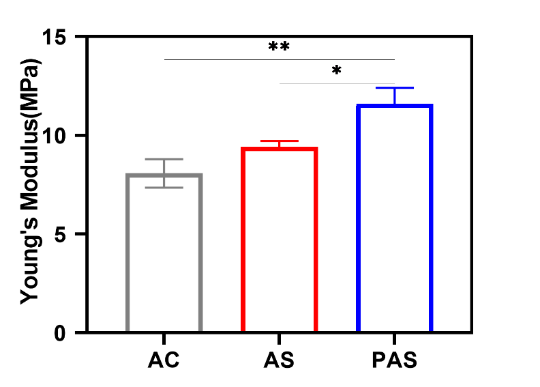


Figure S6 Young's modulus of different scaffolds.


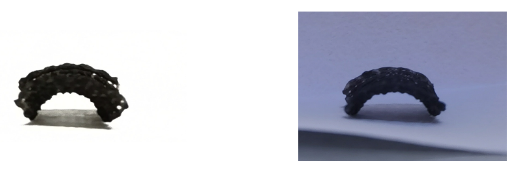


Figure S7 The scaffold maintained its shape even after being placed in ddH₂O for 14 days.


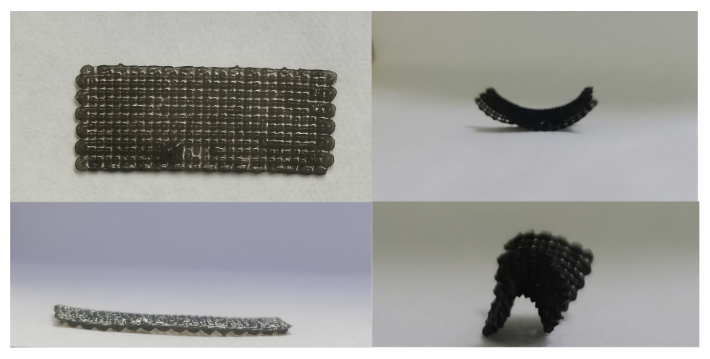


Figure S8 The deformation effect remains unchanged when the printing length is extended
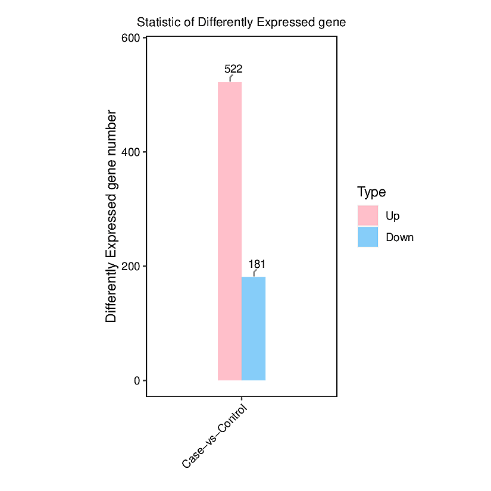


Figure S9 The differential BMSC genes expression of PAS group (control) and PASN group(case).


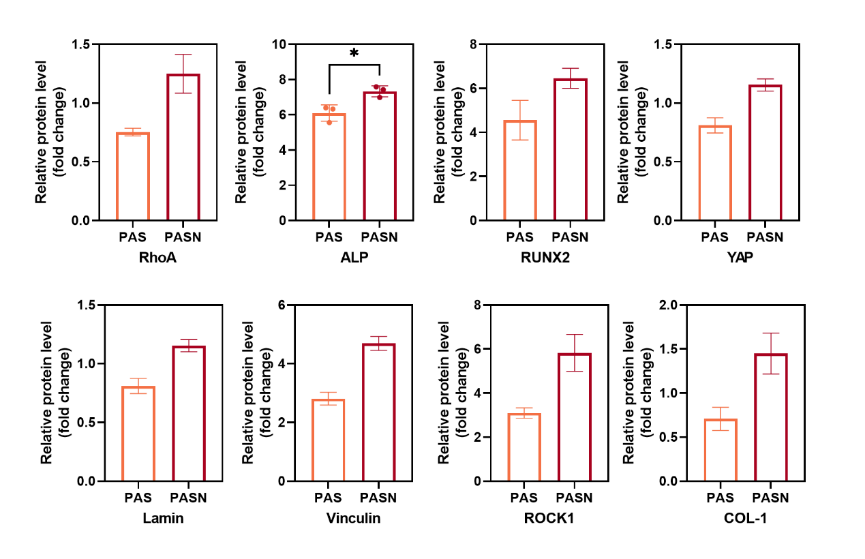


Figure S10 The corresponding quantitative result of western blot analysis of BMSCs.
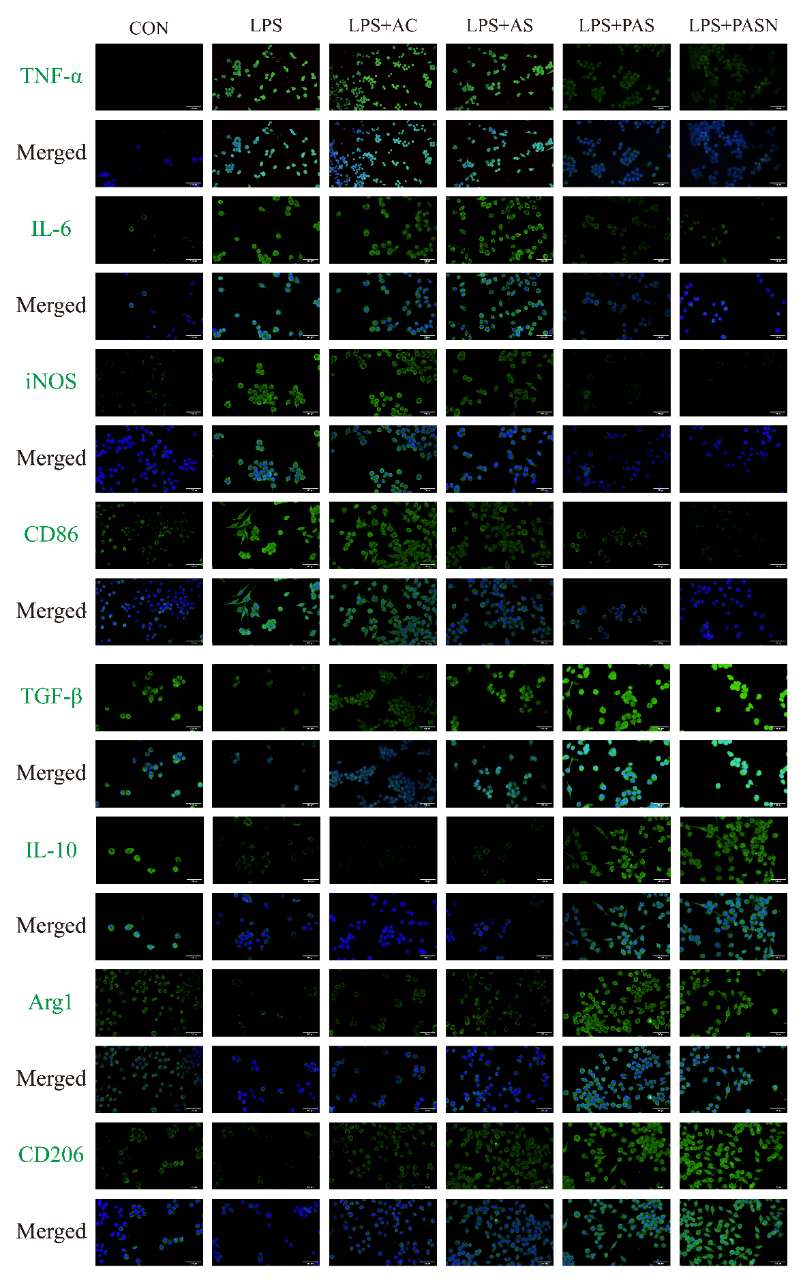


Figure S11 Immunofluorescent staining of macrophages co-cultured with different hydrogel scaffolds for 3 days, green for TNF-α, IL-6, iNOS, CD86, Tgf-β, IL-10, Arg-1,and CD206, and blue (DAPI) for nuclei.


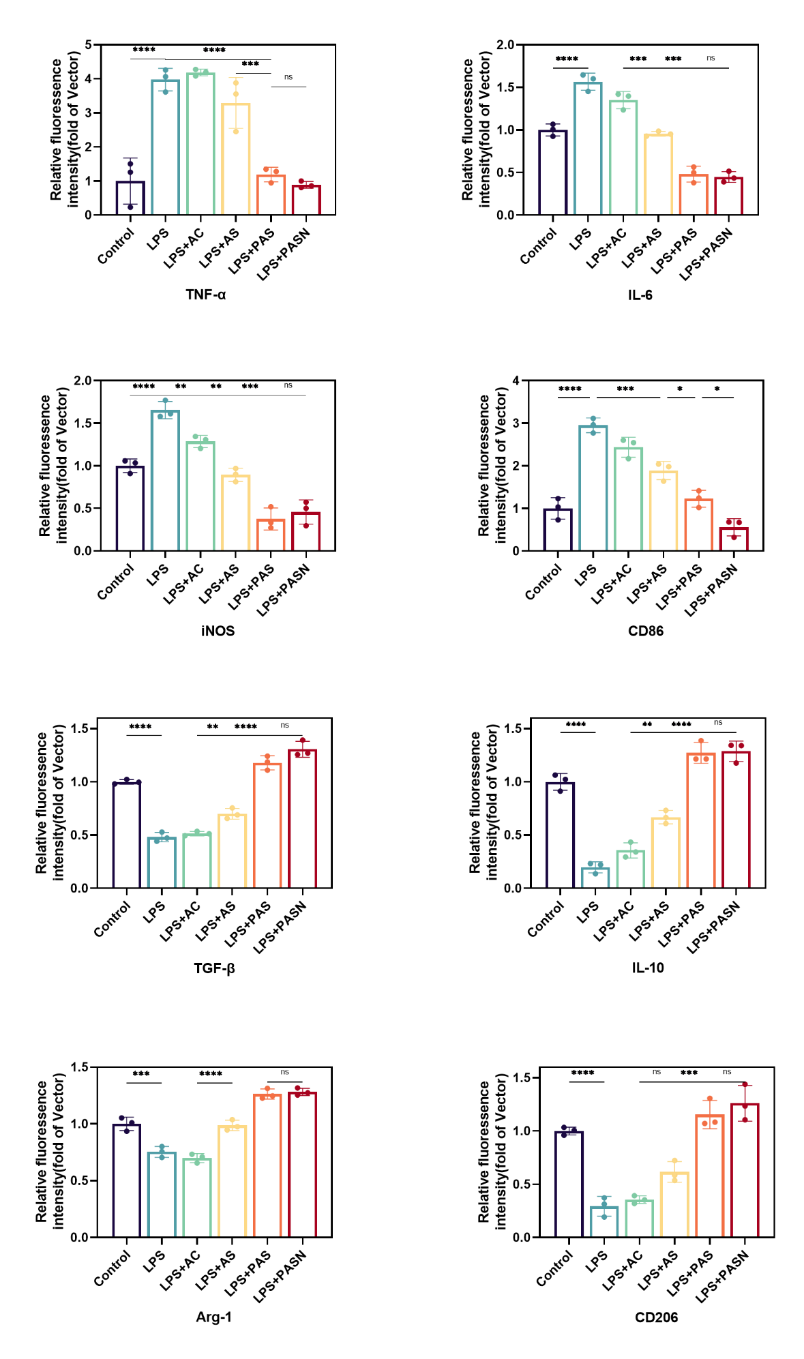


Figure S12 Quantitative analysis of macrophages co-cultured with different hydrogel scaffolds for 3 days.


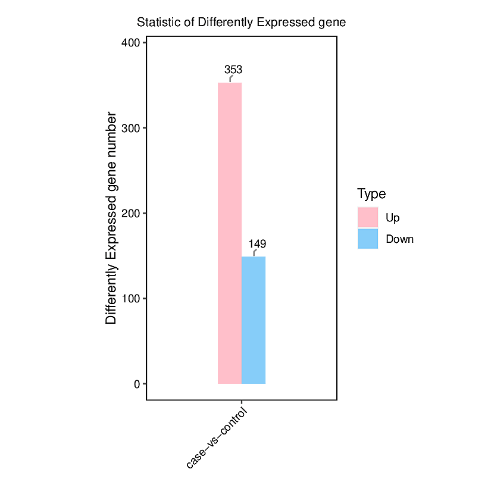


Figure S13 The differential RAW 264.7 genes expression of PAS group (control) and PASN group(case)


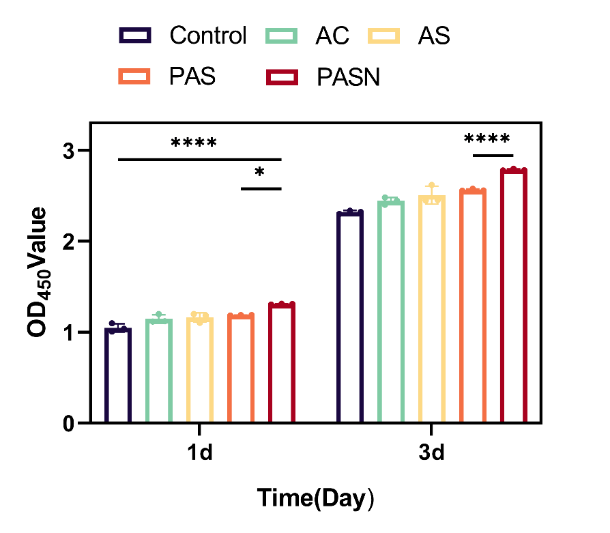


Figure S14 The CCK-8 assay of Control, AC, AS, PAS, PASN scaffolds for HUVECs.


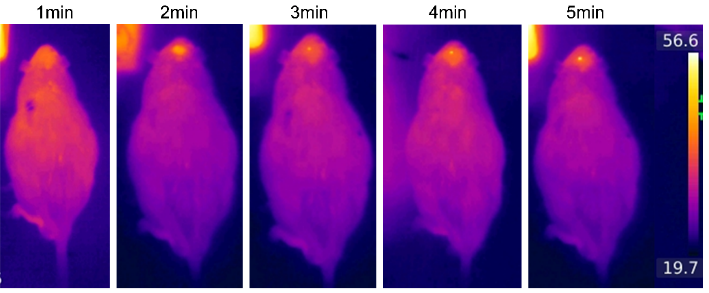


Figure S15 After 5 minutes of NIR treatment (1.5W/cm²), the body temperature of the rats in the PASN group increased up to about 42 °C.


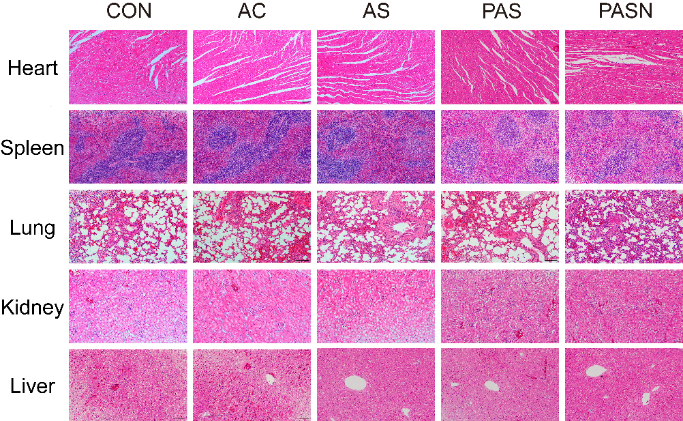


Figure S16 The H&E staining of hearts, livers, spleens, lungs, and kidneys of rats at 8 weeks post-surgery.


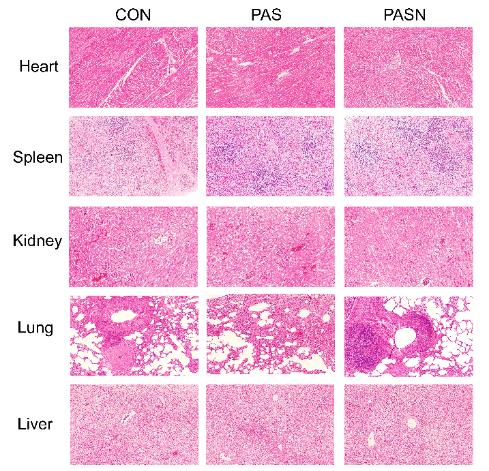


Figure S17 The H&E staining of hearts, livers, spleens, lungs, and kidneys of rabbits at 6 weeks post-surgery.


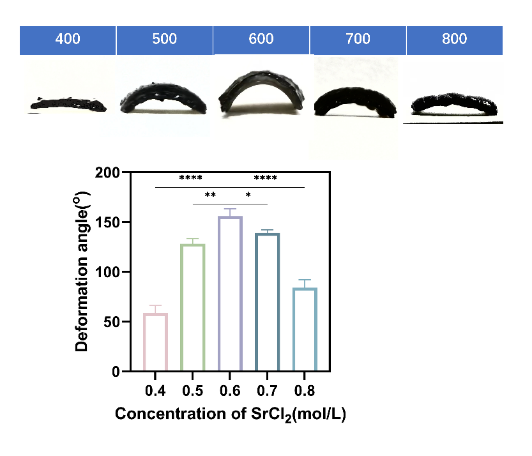


Figure S18 The deformation effect after cross-linking with strontium ions at different concentrations for 5 minutes, followed by 5-minute near-infrared irradiation at 1.5 W.

Table 1 The usage of RT-qRCT primers for osteogenesis-related genes.

| Genes | Forward sequence（5’-3’） | Reverse sequence（5’-3’） |
| --- | --- | --- |
| β-actin | GGAGATTACTGCCCTGGCTCCTA | GACTCATCGTACTCCTGCTTGCTG |
| COL-1 | GACATGTTCAGCTTTGTGGACCTC | AGGGACCCTTAGGCCATTGTGTA |
| OCN | AAGCAGGAGGGCAATAAGGT | CCGTAGATGCGTTTGTAGGC |
| RUNX2 | CATGGCCGGGAATGATGAG | TGTGAAGACCGTTATGGTCAAAGTG |
| ALP | CATCGCCTATCAGCTAATGCACA | ATGAGGTCCAGGCCATCCAG |

Table 2 The usage of RT-qRCT primers for angiogenesis-related genes

| Genes | Forward sequence（5’-3’） | Reverse sequence（5’-3’） |
| --- | --- | --- |
| GAPDH | AGAAGGCTGGGGCTCATTTG | AGGGGCCATCAGTCTTC |
| VEGF | CAGAAGGAGGAGGGCAGAA | GTCTCGATTGGATGGCAGTAG |
| PDGFA | GCAGGAAGCAGGAATGTC | ATACTACAGCGAGGAGGTGTG |
| HIF-α | AGAAACCACCTATGACCTGCT | CGACTGAGGAAAGTCTTGCTA |

Table 3 The usage of RT-qRCT primers for immunomodulation-related genes

| Genes | Forward sequence（5’-3’） | Reverse sequence（5’-3’） |
| --- | --- | --- |
| GAPDH | AGAAGGCTGGGGCTCATTTG | AGGGGCCATCAGTCTTC |
| IL-6 | GGCGGATCGGATGTTGTGAT | GGACCCCAGACAATCGGTTG |
| IL-10  TNF-α | GGTTGTCGTCTCATTCTGAAAGA  CCTGTAGCCCACGTCGTAGC | GGTAGAGGACCCAAGTTCGTTAAGA  TTGAGATCCATGCCGTTG |
| TGF-β  Arg-1 | GGACTACTACGCCAAAGAAG  CATTGGCTTGCGAGACGTAGAC | TCAAAAGACAGCCACTCAGG  GCTGAAGGTCTCTTCCATCACC |

Table 4 The usage of RT-qRCT primers for adhesion-related genes

| Genes | Forward sequence（5’-3’） | Reverse sequence（5’-3’） |
| --- | --- | --- |
| RhoA | CTCATAGTCTTCAGCAAGGACC | GGCGGTCATAATCTTCCTGTC |
| ROCK- 1 | GACTGGGGACAGTTTTGAGAC | GGGCATCCAATCCATCCAGC |
| ROCK- 2 | TTGGTTCGTCATAAGGCATCAC | TGTTGGCAAAGGCCATAATATCT |
| VCL  Lamc1 | GAGGCTGAACTGCTTCAATCA  TGCCGGAGTTTGTTAATGCC | CCAGATTTGACGAGGTGCCTA  CTGGTTGTTGTAGTCGGTCAG |

Video S1 Place the PASN scaffolds into the floor of the maxillary sinus for the operation of maxillary sinus augmentation surgery. 2x
